# Supplementary material for: The toxic effects of single-walled carbon nanotubes are linked to the phagocytic ability of cells
Source: Royal Society of Chemistry journal article supplement (doi:10.1039/c3tx50099c), 2014-01-01
Supplement: c3tx50099c1.pdf [file c3tx50099c1.pdf]

## Supplementary data

### 1 Particle preparation and characterization

#### 1.1 SWCNT preparation

The purchased SWCNTs (P2-SWNTs, Carbon Solutions, Inc. CA, USA) have a poor dispersibility and colloidal stability in aqueous medium. To make well-dispersed SWCNTs in aqueous medium with a proper colloidal stability for the duration of the experiments, the purchased SWCNTs were accurately weighted and suspended in dimethyl sulfoxide (DMSO) to 0.125 mg/mL, followed by ultrasonication for 30 minutes in a water bath sonicator (B3510, Branson Ultrasonics, 40KHz). In the last minute of ultrasonication, the SWCNTs-DMSO suspension was rapidly diluted 5 times by injecting a stabilization buffer (5 mg/mL BSA and 10 mM NaCl in MilliQ water). The mixture, referred to as as-dispersed SWCNTs (AD-SWCNTs), resulted in a clear dark-brown suspension. No sedimentation of AD-SWCNTs was observed for weeks at room temperature indicating a good colloidal stability. To remove the majority of DMSO and free BSA, AD-SWCNTs were pelleted by centrifugation at 16,000 g, 4 °C for 30 min followed by three times wash with 10 mM NaCl in MilliQ water under the same conditions. The colloidal stability and surface charge of SWCNTs at each step were monitored by dynamic light scattering analysis (DLS) (see below). The depletion of DMSO and BSA was monitored by UV-Visible absorption analysis (see below). The SWCNTs aggregates and metallic impurities were characterized by TEM and TEM-EDX (see below). After the washing steps, SWCNTs were re-dispersed in MilliQ water with 10 mM NaCl to about 0.4 mg/mL, which was used in the experiments and here referred to as prepared SWCNTs. The accurate concentration of prepared SWCNTs was determined by near-infrared (NIR) spectrometry, where the standard curve (see below) was made from a set of AD-SWCNTs with known concentrations.

## 1.2 SWCNT characterization – methods, results and discussion

### 1.2.1 TEM and TEM-EDX

As-received SWCNTs were dispersed in MilliQ water to about 0.1 mg/mL by ultrasonication in a water bath sonicator (B3510, Branson Ultrasonics, 40KHz). After sonication 20  $\mu$ L suspension were dropped onto a grid (200 mesh copper grid with formvar/carbon support film, TED PELLA, Inc.) and left to dry at room temperature. The sample was observed by TEM (CM20 PHILIPS, LaB6 filament) at 200 keV. The images were captured by a CCD camera. EDX spectrum was collected at the area with visible metallic impurities by TEM at 200 keV and analyzed with EDAX GENESIS software (EDAX Inc. USA). For prepared SWCNTs as used in the experiments, a proper amount of the stock suspension was diluted in MilliQ water to 0.1 mg/mL and 20  $\mu$ L of the suspension was dropped onto a grid. The grid was left to dry and observed by TEM as describe above.

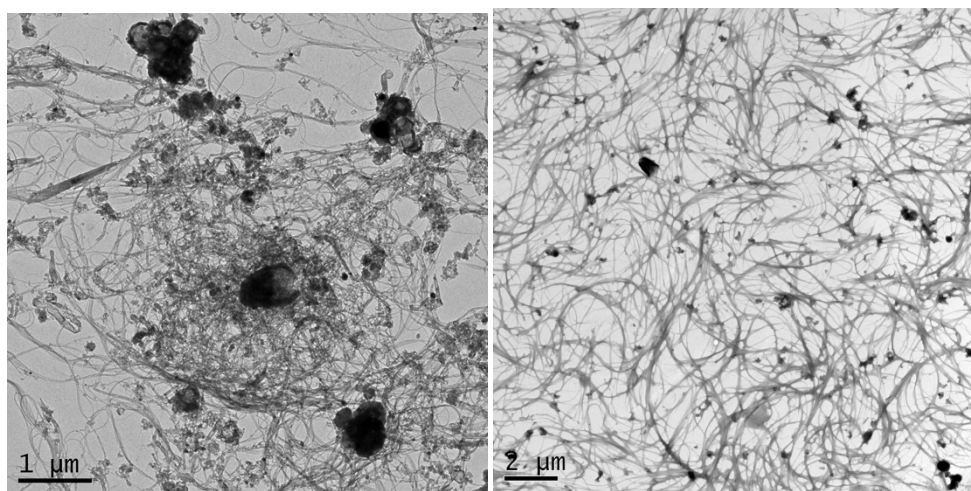

**Figure S1:** TEM images of as-received SWCNTs (left) and prepared SWCNTs (right). The comparison of TEM images of as-received and prepared SWCNTs shows a significant improvement on the dispersibility of prepared SWCNTs in aqueous medium.

### 1.2.2 SEM

Prepared SWCNTs were diluted to 10 µg/mL in MilliQ water and dropped on a 5 x 5 mm<sup>2</sup> silicon wafer to form a thin layer of water. After drying at room temperature, the sample was observed with FEI Magellan XHR SEM in high vacuum mode at 20 keV. Images were captured by a CCD camera. The length and diameter of 49 representative SWCNTs were measured by ImageJ 1.47.

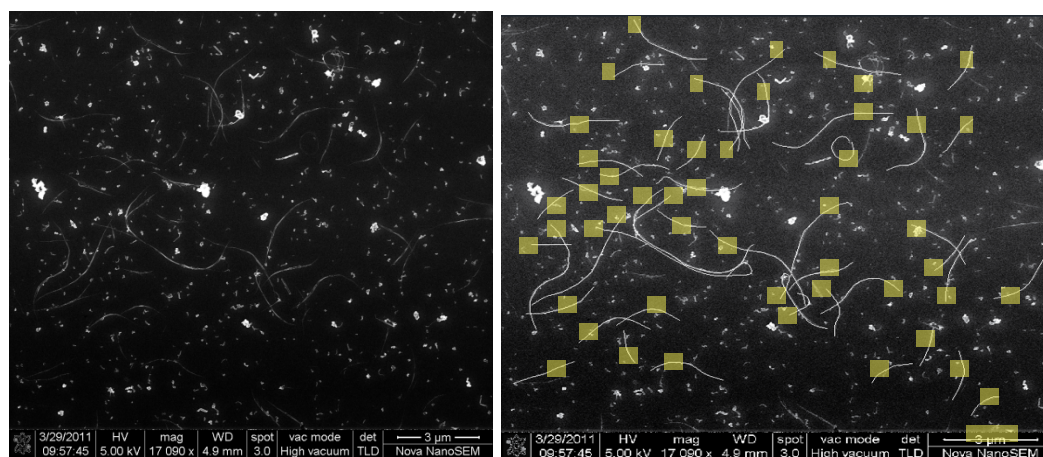

**Figure S2:** SEM image of prepared SWNTs. The length and diameter distributions were measured for 49 representative bundles and are  $2.97 \pm 1.30 \mu\text{m}$  and  $31.79 \pm 8.66 \text{ nm}$  in average, respectively.

### 1.2.3 DLS

SWCNTs samples were diluted in MilliQ water or cell culture medium to 100 µg/mL and incubated for different time periods (up to 25 hours). The SWCNTs were measured by DLS (Zetasizer Nano, Malvern) with 173° backscatter angle, utilizing the high-resolution model, while zeta potentials were measured with the smoluchwski model ( $F(Ka) = 1.5$ ).

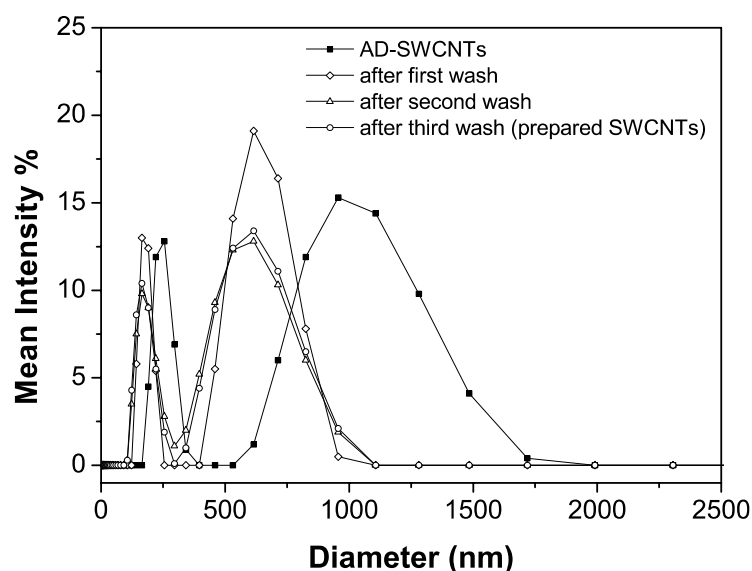

**Figure S3:** Hydrodynamic size distribution of SWCNTs at different preparation steps, measured by DLS. A significant shift after first wash and a minor shift after second wash of “diameter” towards smaller size indicate a possible removal of surrounding BSA on SWCNTs. The lack of significant size change observed between second wash and prepared SWCNTs indicates a good re-dispersibility of prepared SWCNTs. AD-SWCNTs - as-dispersed SWCNTs (see supplementary data chapter 1.1)

**Table S1:** Zeta potential of SWCNTs at different preparation steps and in cell culture medium, measured by DLS. Zeta deviations were generated from the fitting of the model.

|                  | AD-SWCNTs | First wash | Second wash | Prepared SWCNTs | In medium |
|------------------|-----------|------------|-------------|-----------------|-----------|
| Zeta potential   | -19.6     | -46.6      | -54.3       | -50.3           | -14.4     |
| ± Deviation (mV) | ± 3.7     | ± 5.3      | ± 5.1       | ± 5.2           | ± 0.0     |

The zeta potential changes of SWCNTs at different steps are matching the changes of size distribution indicating removal of extra BSA from the SWCNTs surface. In cell culture medium the surface charge of SWCNTs dropped to -14.4 mV, indicating adsorption of protein onto the SWCNT surface.

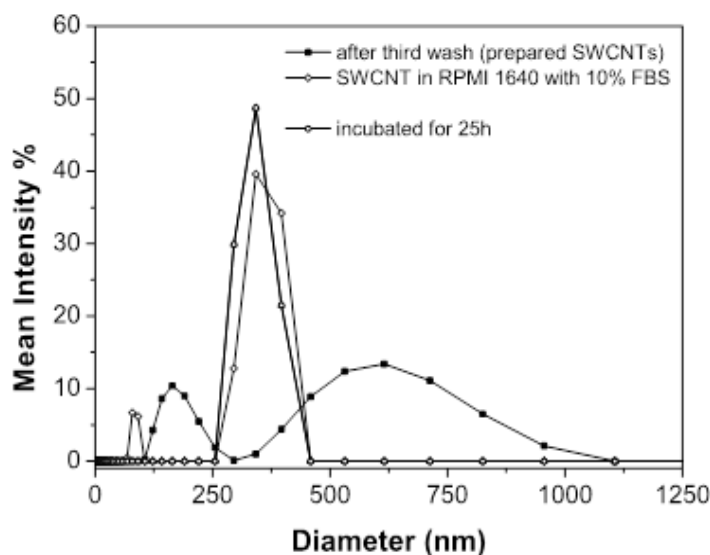

**Figure S4:** Hydrodynamic size distribution of SWCNTs after incubation in cell culture medium. Only a slight increase in size was observed after 25h incubation.

The size distribution readout from DLS does not necessarily reflect the hydrodynamic size of SWCNTs in solution due to the string-like shape of SWCNTs. However, the alteration in size profile of SWCNTs at different conditions indicates the stability of SWCNTs in aqueous mediums. As shown in Figure S4, only a slight increase in size was observed after 25h incubation, even though the surface charge of SWCNTs is low (-14.4 mV), indicating a good colloidal stability of prepared SWCNTs in cell culture medium.

#### 1.2.4 UV-Vis-NIR spectrum analysis

The absorption spectrum of SWCNTs from 200 nm to 1200 nm wavelength was measured with a UV-Vis-NIR spectrophotometer (UV-3600, Shimadzu), and analyzed by UVprobe 2.21 software (Shimadzu). To generate a standard curve for the quantification, AD-SWCNTs was diluted in stabilization buffer to different concentrations ranging from 2.5  $\mu\text{g/mL}$  to 25  $\mu\text{g/mL}$ . The absorption spectra from 200 nm to 1200 nm wavelength were

measured using stabilization buffer as reference. The intensity of absorption peak ( $E_{11}(7,5)$ ) at 1048 nm wavelength was chosen to calculate the extinction coefficient of SWCNTs according to Beer-Lambert law using linear regression.

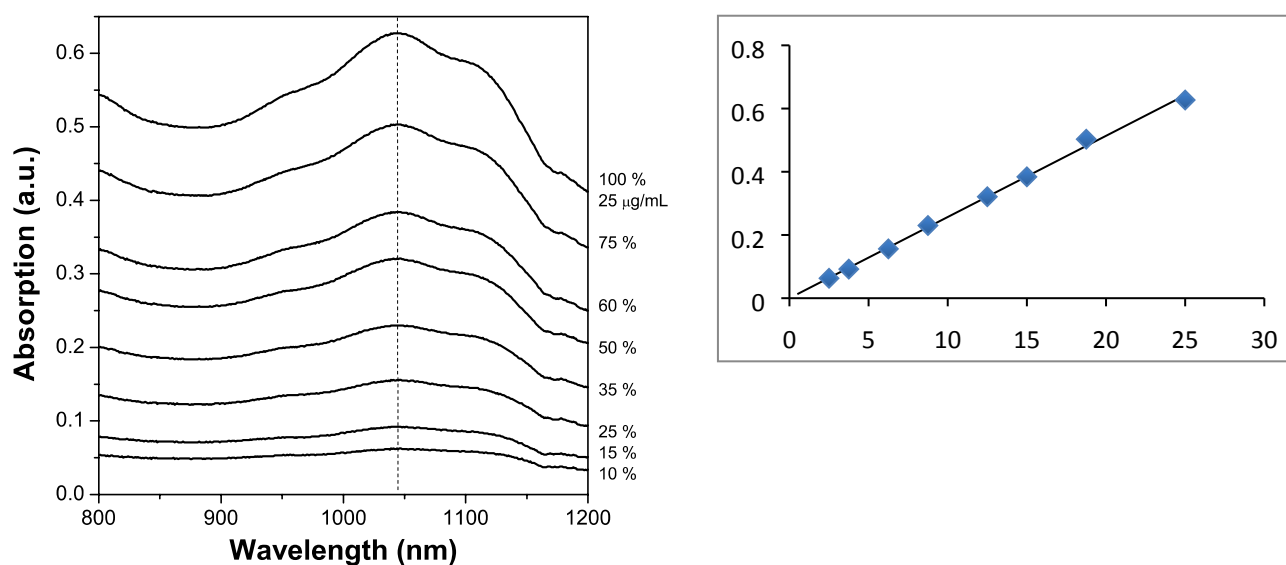

**Figure S5:** Standard curve of AD-SWCNTs and linear regression of absorption peak intensity at 1048 nm. The extinction coefficient of SWCNTs was calculated as  $25.7 \text{ mg}^{-1} \text{ cm}^2$  applying Beer-Lambert law.

## 2 Tables S2 – S4: Microarray results

**Table S2:** Complete list of all differentially regulated genes in A549 cells after 24 hours exposure to 10µg/ml SWCNTs

| Gene symbol   | Fold change<br>SWCNT<br>vs<br>Control | Transcripts<br>Cluster Id | Genbank #                  | Gene description                                                           |
|---------------|---------------------------------------|---------------------------|----------------------------|----------------------------------------------------------------------------|
| ADM2          | 3,29                                  | 8074063                   | AK090635                   | adrenomedullin 2                                                           |
| ALDH1L2       | 2,47                                  | 7965979                   | BC103934                   | aldehyde dehydrogenase 1 family, member L2                                 |
| ANK2          | 3,99                                  | 8096959                   | BX537758                   | ankyrin 2, neuronal                                                        |
| ANO1          | 0,49                                  | 7942135                   | AY728143                   | anoctamin 1, calcium activated chloride channel                            |
| APOH          | 0,37                                  | 8017766                   | BC026283                   | apolipoprotein H (beta-2-glycoprotein I)                                   |
| AQP3          | 0,40                                  | 8160670                   | AK095363                   | aquaporin 3 (Gill blood group)                                             |
| ARRDC4        | 3,69                                  | 7986350                   | BC028704                   | arrestin domain containing 4                                               |
| BAAT          | 0,43                                  | 8162870                   | BC107424                   | bile acid CoA: amino acid N-acyltransferase (glycine N-choloyltransferase) |
| C12orf36      | 0,23                                  | 7961413                   | BC101220                   | chromosome 12 open reading frame 36                                        |
| C12orf39      | 2,93                                  | 7954398                   | AK075342                   | chromosome 12 open reading frame 39                                        |
| C6orf48       | 2,74                                  | 8178090                   | BC000706 BT007334 BC017660 | chromosome 6 open reading frame 48                                         |
| C6orf48       | 2,74                                  | 8179326                   | BC000706 BT007334 BC017660 | chromosome 6 open reading frame 48                                         |
| CAPN5         | 2,21                                  | 7942697                   | AK128124                   | calpain 5                                                                  |
| CCL2          | 0,37                                  | 8006433                   | BC009716                   | chemokine (C-C motif) ligand 2                                             |
| CD38          | 0,37                                  | 8094240                   | D84276                     |                                                                            |
| CDH6          | 0,36                                  | 8104663                   | D31784                     | cadherin 6, type 2, K-cadherin (fetal kidney)                              |
| CHAC1         | 2,76                                  | 7982868                   | BC019625                   | ChaC, cation transport regulator homolog 1 (E. coli)                       |
| CLDN2 RIPPLY1 | 0,41                                  | 8169210                   | BC071747 BC105692          | claudin 2   ripply1 homolog (zebrafish)                                    |
| CRISPLD2      | 0,37                                  | 7997642                   | AY358790                   | cysteine-rich secretory protein LCCL domain containing 2                   |
| CYP1B1        | 0,35                                  | 8051583                   | U03688                     | cytochrome P450, family 1, subfamily B, polypeptide 1                      |
| DDIT3         | 2,88                                  | 7964460                   | BC003637                   | DNA-damage-inducible transcript 3                                          |
| DLEU2         | 0,41                                  | 7971653                   | AF264787                   | deleted in lymphocytic leukemia 2 (non-protein coding)                     |

|                         |      |         |                                              |                                                                                                             |
|-------------------------|------|---------|----------------------------------------------|-------------------------------------------------------------------------------------------------------------|
| ECM2                    | 2,84 | 8162404 | BX537976                                     | extracellular matrix protein 2, female organ and adipocyte specific                                         |
| FAM111B                 | 0,43 | 7940147 | AY457926                                     | family with sequence similarity 111, member B                                                               |
| FAM129A                 | 8,91 | 7922846 | AF288391                                     | family with sequence similarity 129, member A                                                               |
| FGFBP1                  | 0,33 | 8099467 | BC008910                                     | fibroblast growth factor binding protein 1                                                                  |
| GDA                     | 0,23 | 8155802 | AF019638                                     | guanine deaminase                                                                                           |
| GTPBP2                  | 2,22 | 8126629 | BC064968 AK290267 AB024574 AJ420518 BC032315 | GTP binding protein 2                                                                                       |
| HAS3 CTHF8              | 0,45 | 7996883 | BC021853 AF232772 AF234839 AK291400          | hyaluronan synthase 3   CTF8,<br>chromosome transmission fidelity factor 8 homolog ( <i>S. cerevisiae</i> ) |
| HIST1H2BJ               | 0,39 | 8124484 |                                              | histone cluster 1, H2bj                                                                                     |
| HMGCS1                  | 0,34 | 8111941 | BC083514                                     | 3-hydroxy-3-methylglutaryl-CoA synthase 1 (soluble)                                                         |
| IL11                    | 2,35 | 8039484 | BC012506                                     | interleukin 11                                                                                              |
| INSIG1                  | 0,34 | 8137526 | BC001880                                     | insulin induced gene 1                                                                                      |
| IQGAP2                  | 0,40 | 8106354 | AK291066                                     | IQ motif containing GTPase activating protein 2                                                             |
| KCNG1                   | 2,35 | 8067029 | BC046629 AK290689 AF033383 BC006367 AK128721 | potassium voltage-gated channel, subfamily G, member 1                                                      |
| KCNG1                   | 2,61 | 8067033 | BC006367 BC046629 AK290689 AF033383          | potassium voltage-gated channel, subfamily G, member 1                                                      |
| KRT4                    | 0,47 | 7963534 | AK056254                                     | keratin 4                                                                                                   |
| LOH3CR2A                | 0,40 | 8077499 | AF086709 AK054898                            | loss of heterozygosity, 3, chromosomal region 2, gene A                                                     |
| LY6K                    | 0,42 | 8148553 | AJ001348                                     | lymphocyte antigen 6 complex, locus K                                                                       |
| MAFK TMEM184A           | 2,33 | 8131091 | AK092414                                     | v-maf musculoaponeurotic fibrosarcoma oncogene homolog K (avian)<br>transmembrane protein 184A              |
| MGAM                    | 0,13 | 8136662 | AF016833                                     | maltase-glucoamylase (alpha-glucosidase)                                                                    |
| MMP7                    | 0,36 | 7951217 | BC003635                                     | matrix metalloproteinase 7 (matrilysin, uterine)                                                            |
| MRAP2                   | 0,43 | 8120961 | BC010003                                     | melanocortin 2 receptor accessory protein 2                                                                 |
| OLFML3                  | 0,31 | 7904158 | AY358954                                     | olfactomedin-like 3                                                                                         |
| PCK2                    | 2,30 | 7973530 | BC001454                                     | phosphoenolpyruvate carboxykinase 2 (mitochondrial)                                                         |
| PRDM1                   | 2,80 | 8121257 | AY198414                                     | PR domain containing 1, with ZNF domain                                                                     |
| S100P                   | 2,36 | 8093950 | AF539739                                     | S100 calcium binding protein P                                                                              |
| SESN2                   | 3,44 | 7899436 | AY123223                                     | sestrin 2                                                                                                   |
| SFRP4                   | 0,35 | 8139087 | AF026692                                     | secreted frizzled-related protein 4                                                                         |
| SLFN5                   | 3,45 | 8006531 | AK303299                                     | schlafen family member 5                                                                                    |
| SMOC1                   | 3,18 | 7975390 | AK289988                                     | SPARC related modular calcium binding 1                                                                     |
| SMOX                    | 2,35 | 8060745 | EF032141                                     | spermine oxidase                                                                                            |
| SNTB1                   | 3,18 | 8152606 | AK292655                                     | syntrophin, beta 1 (dystrophin-associated protein A1,<br>59kDa, basic component 1)                          |
| SPANXB1 SPANXB2 SPANXF1 | 0,46 | 8170241 | AF098307 BC054023                            | SPANX family, member B1   SPANX family, member B2                                                           |



|                         |      |         |                   |                                                                             |
|-------------------------|------|---------|-------------------|-----------------------------------------------------------------------------|
|                         |      |         |                   | SPANX family, member F1                                                     |
| SPANXB1 SPANXB2 SPANXF1 | 0,46 | 8170244 | AF098307 BC054023 | SPANX family, member B1   SPANX family, member B2   SPANX family, member F1 |
| TAGLN PCSK7             | 2,22 | 7944082 | BC004927          | transgelin   proprotein convertase subtilisin/kexin type 7                  |
| TIPARP                  | 0,47 | 8083569 | BC050350          | TCDD-inducible poly(ADP-ribose) polymerase                                  |
| TPPP3                   | 0,33 | 8002020 | BC000691          | tubulin polymerization-promoting protein family member 3                    |
| TRIB3                   | 3,56 | 8060344 | AY247738          | tribbles homolog 3 (Drosophila)                                             |
| TXNIP                   | 6,57 | 7904726 | S73591            | thioredoxin interacting protein                                             |
| ULBP1                   | 2,46 | 8122724 | BC035416          | UL16 binding protein 1                                                      |
| VSIG1                   | 0,36 | 8169263 | BC043216          | V-set and immunoglobulin domain containing 1                                |
| ZHX2                    | 2,18 | 8148149 | BC042145          | zinc fingers and homeoboxes 2                                               |

**Table S3:** Complete list of all differentially regulated genes in monocyte derived THP-1 macrophages after 24 hours exposure to 10µg/ml SWCNTs

| Gene symbol   | Fold change SWCNT vs Control | Transcripts Cluster Id | Genbank #              | Gene description                                                                                               |
|---------------|------------------------------|------------------------|------------------------|----------------------------------------------------------------------------------------------------------------|
| AMPD3         | 2,56                         | 7938396                | BC126118               | adenosine monophosphate deaminase 3                                                                            |
| AQP9          | 2,27                         | 7983910                | AF016495               | aquaporin 9                                                                                                    |
| BCL3          | 2,37                         | 8029465                | BC064993               | B-cell CLL/lymphoma 3                                                                                          |
| BIRC3         | 5,17                         | 7943413                | AF070674               | baculoviral IAP repeat-containing 3                                                                            |
| CAV1          | 2,16                         | 8135594                | AK290871               | caveolin 1, caveolae protein, 22kDa                                                                            |
| CCL20         | 3,79                         | 8048864                | BC020698               | chemokine (C-C motif) ligand 20                                                                                |
| CCL3          | 2,82                         | 8014369                | M23452                 | chemokine (C-C motif) ligand 3                                                                                 |
| CCL3L1 CCL3L3 | 2,82                         | 8014391                | BC007783 D00044 X52149 | chemokine (C-C motif) ligand 3-like 1   chemokine (C-C motif) ligand 3-like 3   chemokine (C-C motif) ligand 3 |
| CCL3L1 CCL3L3 | 2,82                         | 8014414                | BC007783 D00044 X52149 | chemokine (C-C motif) ligand 3-like 1   chemokine (C-C motif) ligand 3-like 3   chemokine (C-C motif) ligand 3 |
| CCL3L1 CCL3L3 | 2,82                         | 8019731                | BC007783 D00044 X52149 | chemokine (C-C motif) ligand 3-like 1   chemokine (C-C motif) ligand 3-like 3   chemokine (C-C motif) ligand 3 |
| CCL4          | 3,95                         | 8006602                | AY766446               | chemokine (C-C motif) ligand 4                                                                                 |
| CCL4L1 CCL4L2 | 9,59                         | 8006608                | AY766452 AY766446      | chemokine (C-C motif) ligand 4-like 1   chemokine (C-C motif) ligand 4-like 2   chemokine (C-C motif) ligand 4 |
| CCL4L1 CCL4L2 | 9,60                         | 8006621                | AY766447 AY766446      | chemokine (C-C motif) ligand 4-like 1   chemokine (C-C motif) ligand 4-like 2   chemokine (C-C motif) ligand 4 |

|                          |      |         |                                                                                       |                                                                                                                 |
|--------------------------|------|---------|---------------------------------------------------------------------------------------|-----------------------------------------------------------------------------------------------------------------|
| <b>CCL4L1 CCL4L2</b>     | 9,60 | 8019651 | AY766447 AY766446                                                                     | chemokine (C-C motif) ligand 4-like 1   chemokine (C-C motif) ligand 4-like 2   chemokine (C-C motif) ligand 4  |
| <b>CD274</b>             | 2,85 | 8154233 | AF233516                                                                              |                                                                                                                 |
| <b>CD48</b>              | 2,77 | 7921667 | BC016182                                                                              |                                                                                                                 |
| <b>CD80</b>              | 3,67 | 8089771 | BC042665                                                                              |                                                                                                                 |
| <b>CHAC1</b>             | 3,01 | 7982868 | BC019625                                                                              | ChaC, cation transport regulator homolog 1 (E. coli)                                                            |
| <b>CHST2</b>             | 3,56 | 8083214 | AB021124                                                                              | carbohydrate (N-acetylglucosamine-6-O) sulfotransferase 2                                                       |
| <b>CXCL1</b>             | 4,50 | 8095697 | BC011976 M57731                                                                       | chemokine (C-X-C motif) ligand 1 (melanoma growth stimulating activity, alpha)                                  |
| <b>CXCL10</b>            | 6,21 | 8101126 | BC010954                                                                              | chemokine (C-X-C motif) ligand 10                                                                               |
| <b>CXCL11</b>            | 2,90 | 8101131 | BC012532                                                                              | chemokine (C-X-C motif) ligand 11                                                                               |
| <b>CXCL12</b>            | 3,08 | 7933194 | L36033                                                                                | chemokine (C-X-C motif) ligand 12                                                                               |
| <b>DLL4</b>              | 2,83 | 7982854 | AB036931                                                                              | delta-like 4 (Drosophila)                                                                                       |
| <b>EBI3</b>              | 3,91 | 8024792 | L08187                                                                                | Epstein-Barr virus induced 3                                                                                    |
| <b>FABP6</b>             | 2,46 | 8109629 | BC022489                                                                              | fatty acid binding protein 6, ileal                                                                             |
| <b>FEZ1</b>              | 2,48 | 7952490 | BC009545                                                                              | fasciculation and elongation protein zeta 1 (zygin I)                                                           |
| <b>GCH1</b>              | 2,42 | 7979269 | U66097                                                                                | GTP cyclohydrolase 1                                                                                            |
| <b>GJB2</b>              | 3,82 | 7970441 | M86849                                                                                | gap junction protein, beta 2, 26kDa                                                                             |
| <b>HLA-DQA1</b>          | 2,18 | 8118556 | AB209628                                                                              | major histocompatibility complex, class II, DQ alpha 1                                                          |
| <b>HLA-DQA2 HLA-DQA1</b> | 2,16 | 8118564 |                                                                                       | major histocompatibility complex, class II, DQ alpha 2   major histocompatibility complex, class II, DQ alpha 1 |
| <b>HLA-DQA2 HLA-DQA1</b> | 2,16 | 8178205 |                                                                                       | major histocompatibility complex, class II, DQ alpha 2   major histocompatibility complex, class II, DQ alpha 1 |
| <b>HP</b>                | 0,41 | 7997188 | BC121125 K00422 L29394 BC107587 BC121124 BC017862 BC058031 BC070299 AK055872 CR616676 | haptoglobin                                                                                                     |
| <b>HPR</b>               | 0,37 | 7997192 |                                                                                       | haptoglobin-related protein                                                                                     |
| <b>IL1B</b>              | 2,46 | 8054722 | BC008678                                                                              | interleukin 1, beta                                                                                             |
| <b>IL21R</b>             | 2,19 | 7994292 | BC004348                                                                              | interleukin 21 receptor                                                                                         |
| <b>IL32</b>              | 5,38 | 7992828 | BC009401                                                                              | interleukin 32                                                                                                  |
| <b>IL4I1 NUP62</b>       | 2,05 | 8038487 | DQ079587 AK125857                                                                     | interleukin 4 induced 1   nucleoporin 62kDa                                                                     |
| <b>IL8</b>               | 3,82 | 8095680 | M17017                                                                                | interleukin 8                                                                                                   |
| <b>JAM2</b>              | 2,29 | 8068024 | AY016009                                                                              | junctional adhesion molecule 2                                                                                  |
| <b>NFKBIA</b>            | 2,36 | 7978644 | BC002601                                                                              | nuclear factor of kappa light polypeptide gene enhancer in B-cells inhibitor, alpha                             |
| <b>PDCD1LG2</b>          | 2,15 | 8154245 | AF344424                                                                              | programmed cell death 1 ligand 2                                                                                |
| <b>RAB44</b>             | 0,46 | 8119096 | AK125083                                                                              |                                                                                                                 |
| <b>RELB</b>              | 2,57 | 8029580 | BC028013                                                                              | v-rel reticuloendotheliosis viral oncogene homolog B                                                            |

|                  |       |         |                                     |                                                                                        |
|------------------|-------|---------|-------------------------------------|----------------------------------------------------------------------------------------|
| <b>RNF144B</b>   | 3,06  | 8117106 | AB076367                            | ring finger protein 144B                                                               |
| <b>RTN1</b>      | 2,24  | 7979455 | L10333                              | reticulon 1                                                                            |
| <b>SEMA3A</b>    | 2,53  | 8140668 | BC111416                            | sema domain, immunoglobulin domain (Ig), short basic domain, secreted, (semaphorin) 3A |
| <b>SERPINB10</b> | 0,41  | 8021645 | BC096217                            | serpin peptidase inhibitor, clade B (ovalbumin), member 10                             |
| <b>SLC2A6</b>    | 3,00  | 8164918 | BC013740 AK294974 AK096630 AB209108 | solute carrier family 2 (facilitated glucose transporter), member 6                    |
| <b>SOD2</b>      | 3,65  | 8130556 | BC012423                            | superoxide dismutase 2, mitochondrial                                                  |
| <b>SULF2</b>     | 0,44  | 8066822 | AB033073                            | sulfatase 2                                                                            |
| <b>TNFAIP3</b>   | 2,62  | 8122265 | M59465                              | tumor necrosis factor, alpha-induced protein 3                                         |
| <b>TNFAIP6</b>   | 18,39 | 8045688 | BC030205                            | tumor necrosis factor, alpha-induced protein 6                                         |
| <b>TNFRSF9</b>   | 3,03  | 7912145 | L12964                              | tumor necrosis factor receptor superfamily, member 9                                   |
| <b>VCAM1</b>     | 2,97  | 7903358 | BC017276                            | vascular cell adhesion molecule 1                                                      |
| <b>VIT</b>       | 0,42  | 8041467 | AY358338                            | vitrin                                                                                 |
| <b>ZC3H12A</b>   | 2,16  | 7900146 | BC005001                            | zinc finger CCCH-type containing 12A                                                   |

**Table S4:** Complete list of all differentially regulated genes in J774 macrophages after 24 hours exposure to 10µg/ml SWCNTs

| Gene symbol          | Fold<br>change<br>SWCNT<br>vs<br>Control | Transcripts<br>Cluster Id | Genbank #                           | gene description                                                                              |
|----------------------|------------------------------------------|---------------------------|-------------------------------------|-----------------------------------------------------------------------------------------------|
| <b>Abi3 Phospho1</b> | 0,36                                     | 10390186                  | BC058260                            | ABI gene family, member 3   phosphatase, orphan 1                                             |
| <b>Acap1</b>         | 0,22                                     | 10387699                  | BC031462                            | ArfGAP with coiled-coil, ankyrin repeat and PH domains 1                                      |
| <b>Acy1</b>          | 0,35                                     | 10596465                  | BC005631                            | aminoacylase 1                                                                                |
| <b>Acyp2</b>         | 2,29                                     | 10384936                  | BC027642                            | acylphosphatase 2, muscle type                                                                |
| <b>Adamts7</b>       | 2,78                                     | 10587748                  | BC141173 BC145491 AY551090 AK052239 | a disintegrin-like and metallopeptidase (reprolysin type) with thrombospondin type 1 motif, 7 |
| <b>Adap1</b>         | 0,40                                     | 10535065                  | BC144874                            | ArfGAP with dual PH domains 1                                                                 |
| <b>Akna</b>          | 0,42                                     | 10513666                  | BC092227                            | AT-hook transcription factor                                                                  |
| <b>Aldh3b1</b>       | 0,47                                     | 10464560                  | BC046597                            | aldehyde dehydrogenase 3 family, member B1                                                    |
| <b>Alox5</b>         | 0,14                                     | 10547153                  | BC139102                            | arachidonate 5-lipoxygenase                                                                   |
| <b>Ambp</b>          | 0,38                                     | 10513630                  | BC021660                            | alpha 1 microglobulin/bikunin                                                                 |
| <b>Arhgap30</b>      | 0,48                                     | 10351603                  | BC082573                            | Rho GTPase activating protein 30                                                              |

|                      |      |          |                                   |                                                                                                       |
|----------------------|------|----------|-----------------------------------|-------------------------------------------------------------------------------------------------------|
| <b>Arhgap4</b>       | 0,31 | 10605143 | AF443826                          | Rho GTPase activating protein 4                                                                       |
| <b>Arhgef1</b>       | 0,46 | 10551030 | BC012488                          | Rho guanine nucleotide exchange factor (GEF) 1                                                        |
| <b>Asb2</b>          | 0,23 | 10402325 | BC031161                          | ankyrin repeat and SOCS box-containing 2                                                              |
| <b>Atp10d</b>        | 0,44 | 10522335 | BC141328                          | ATPase, class V, type 10D                                                                             |
| <b>Atp2a3</b>        | 0,33 | 10378216 | BC017639                          | ATPase, Ca++ transporting, ubiquitous                                                                 |
| <b>Bank1</b>         | 0,29 | 10502335 | AY178734                          | B-cell scaffold protein with ankyrin repeats 1                                                        |
| <b>BC005685</b>      | 0,45 | 10401937 | AF263910 BC052501 AF043688 M11024 |                                                                                                       |
| <b>Bex6</b>          | 0,24 | 10435009 | AY833559                          | brain expressed gene 6                                                                                |
| <b>Bin2</b>          | 0,25 | 10432640 | BC127021                          | bridging integrator 2                                                                                 |
| <b>C130050O18Rik</b> | 0,30 | 10526947 | BC100320                          | RIKEN cDNA C130050O18 gene                                                                            |
| <b>C1qa</b>          | 0,36 | 10517517 | BC002086                          | complement component 1, q subcomponent, alpha polypeptide                                             |
| <b>C1s Gm5077</b>    | 2,49 | 10547740 | AF459019                          | complement component 1, s subcomponent   predicted gene 5077                                          |
| <b>Calcl</b>         | 0,29 | 10484371 | AB015595                          | calcitonin receptor-like                                                                              |
| <b>Card9</b>         | 0,26 | 10480956 | BC151023                          | caspase recruitment domain family, member 9                                                           |
| <b>Ccl5</b>          | 2,88 | 10389207 | BC033508                          | chemokine (C-C motif) ligand 5                                                                        |
| <b>Ccl8</b>          | 3,89 | 10379535 | BC117101                          | chemokine (C-C motif) ligand 8                                                                        |
| <b>Cd300ld</b>       | 0,38 | 10392808 | BC019814                          | CD300 molecule-like family member d                                                                   |
| <b>Cd300lg</b>       | 0,24 | 10381514 | AB243063                          | CD300 antigen like family member G                                                                    |
| <b>Cd74</b>          | 0,42 | 10456005 | BC096435                          | CD74 antigen (invariant polypeptide of major histocompatibility complex, class II antigen-associated) |
| <b>Cfp</b>           | 0,33 | 10603860 | BC132369                          | complement factor properdin                                                                           |
| <b>Clec12a</b>       | 0,41 | 10542164 | BC094904                          | C-type lectin domain family 12, member a                                                              |
| <b>Clec5a</b>        | 0,42 | 10544273 | BC104364                          | C-type lectin domain family 5, member a                                                               |
| <b>Coro1a</b>        | 0,38 | 10568024 | AF143955                          | coronin, actin binding protein 1A                                                                     |
| <b>Coro7</b>         | 0,44 | 10437399 | BC061006                          | coronin 7                                                                                             |
| <b>Cp</b>            | 2,06 | 10490989 | BC062957                          | ceruloplasmin                                                                                         |
| <b>Crct1</b>         | 2,50 | 10499952 | BC060280                          | cysteine-rich C-terminal 1                                                                            |
| <b>Crisp1</b>        | 3,62 | 10450930 | BC011150                          | cysteine-rich secretory protein 1                                                                     |
| <b>Cryl1</b>         | 0,41 | 10420372 | AF351609                          | crystallin, lambda 1                                                                                  |
| <b>Cxcl1</b>         | 3,25 | 10523151 | BC037997 AF352782                 | chemokine (C-X-C motif) ligand 1                                                                      |
| <b>Cxcl11</b>        | 2,49 | 10531420 | AF179872                          | chemokine (C-X-C motif) ligand 11                                                                     |
| <b>Cysltr1</b>       | 0,46 | 10606355 | BC027102                          | cysteinyl leukotriene receptor 1                                                                      |
| <b>Dgkg</b>          | 0,43 | 10438639 | BC015278                          | diacylglycerol kinase, gamma                                                                          |

|                                   |      |          |                   |                                                                                                                                 |
|-----------------------------------|------|----------|-------------------|---------------------------------------------------------------------------------------------------------------------------------|
| <b>Dok2</b>                       | 0,20 | 10416334 | AF030627          | docking protein 2                                                                                                               |
| <b>Dok3</b>                       | 0,31 | 10409502 | BC116922          | docking protein 3                                                                                                               |
| <b>Dpep2</b>                      | 0,36 | 10581434 | AF488552          | dipeptidase 2                                                                                                                   |
| <b>Endod1</b>                     | 0,44 | 10590909 | BC096490          | endonuclease domain containing 1                                                                                                |
| <b>Enpp2</b>                      | 3,51 | 10428619 | BC058759          | ectonucleotide pyrophosphatase/phosphodiesterase 2                                                                              |
| <b>F11r</b>                       | 0,43 | 10351623 | BC021876          | F11 receptor                                                                                                                    |
| <b>F9</b>                         | 0,40 | 10599826 |                   | coagulation factor IX                                                                                                           |
| <b>Fam46c</b>                     | 2,38 | 10500610 | BC046309          | family with sequence similarity 46, member C                                                                                    |
| <b>Fcgr2b</b>                     | 0,43 | 10360028 | M16367            | Fc receptor, IgG, low affinity IIb                                                                                              |
| <b>Fermt3</b>                     | 0,34 | 10465587 | BC066803          | fermitin family homolog 3 (Drosophila)                                                                                          |
| <b>Fmn1l</b>                      | 0,36 | 10381708 | AF006466          | formin-like 1                                                                                                                   |
| <b>G530011O06Rik</b>              | 0,37 | 10607950 |                   | RIKEN cDNA G530011O06 gene                                                                                                      |
| <b>Gas7</b>                       | 0,40 | 10377215 | U19860            | growth arrest specific 7                                                                                                        |
| <b>Gbp1 Gbp5</b>                  | 2,79 | 10496555 | EF494422 AF422243 | guanylate binding protein 1   guanylate binding protein 5                                                                       |
| <b>Gbp2</b>                       | 3,32 | 10496592 | AF077007          | guanylate binding protein 2                                                                                                     |
| <b>Gdpd1</b>                      | 3,49 | 10389590 | BC016541          | glycerophosphodiester phosphodiesterase domain containing 1                                                                     |
| <b>Gm10554</b>                    | 0,45 | 10453759 |                   | predicted gene 10554                                                                                                            |
| <b>Gm10639 Gsta2 Gsta1 Gm3776</b> | 4,77 | 10587339 | BC061134 J03958   | predicted gene 10639   glutathione S-transferase, alpha 2 (Yc2)   glutathione S-transferase, alpha 1 (Ya)   predicted gene 3776 |
| <b>Gm885</b>                      | 0,41 | 10382106 | AB542953          | predicted gene 885                                                                                                              |
| <b>Gm8995</b>                     | 0,43 | 10566583 | AK172683          | predicted gene 8995                                                                                                             |
| <b>Gngt2 Abi3</b>                 | 0,42 | 10380571 | BC061005          | guanine nucleotide binding protein (G protein), gamma transducing activity polypeptide 2   ABI gene family, member 3            |
| <b>Gpd1l</b>                      | 0,45 | 10597477 | BC138976          | glycerol-3-phosphate dehydrogenase 1-like                                                                                       |
| <b>Gpnmb</b>                      | 2,69 | 10538187 | BC026375          | glycoprotein (transmembrane) nmb                                                                                                |
| <b>Gpr84</b>                      | 0,32 | 10433101 | BC023249          | G protein-coupled receptor 84                                                                                                   |
| <b>Gsta1 Gm10639 Gsta2 Gm3776</b> | 4,77 | 10587331 | BC061134 J03958   | glutathione S-transferase, alpha 1 (Ya)   predicted gene 10639   glutathione S-transferase, alpha 2 (Yc2)   predicted gene 3776 |
| <b>Gsta1 Gsta2 Gm10639 Gm3776</b> | 4,78 | 10587323 | BC061134 J03958   | glutathione S-transferase, alpha 1 (Ya)   glutathione S-transferase, alpha 2 (Yc2)   predicted gene 10639   predicted gene 3776 |
| <b>Gsta2 Gm10639 Gsta1 Gm3776</b> | 4,73 | 10595148 | BC132572 J03958   | glutathione S-transferase, alpha 2 (Yc2)   predicted gene 10639   glutathione S-transferase, alpha 1 (Ya)   predicted gene 3776 |
| <b>Gsta4</b>                      | 2,69 | 10587315 | BC012639          | glutathione S-transferase, alpha 4                                                                                              |
| <b>Gstk1</b>                      | 0,29 | 10537712 | AY279096          | glutathione S-transferase kappa 1                                                                                               |
| <b>H2-DMb2 H2-DMb1</b>            | 0,38 | 10444236 | U35330 BC052864   | histocompatibility 2, class II, locus Mb2   histocompatibility 2, class II, locus Mb1                                           |
| <b>H2-M2</b>                      | 2,75 | 10450880 | AY302217          | histocompatibility 2, M region locus 2                                                                                          |

|                 |      |          |                                                              |                                                              |
|-----------------|------|----------|--------------------------------------------------------------|--------------------------------------------------------------|
| <b>Hal</b>      | 2,22 | 10365769 | BC157999                                                     | histidine ammonia lyase                                      |
| <b>Hck</b>      | 0,36 | 10477250 | BC010478                                                     | hemopoietic cell kinase                                      |
| <b>Hs3st1</b>   | 0,27 | 10529732 | AF019385                                                     | heparan sulfate (glucosamine) 3-O-sulfotransferase 1         |
| <b>Hs3st3b1</b> | 0,47 | 10386951 | AF168992                                                     | heparan sulfate (glucosamine) 3-O-sulfotransferase 3B1       |
| <b>Icosl</b>    | 0,48 | 10364361 | BC029227                                                     | icos ligand                                                  |
| <b>Ifi27l2a</b> | 0,47 | 10402347 | BC100588                                                     | interferon, alpha-inducible protein 27 like 2A               |
| <b>Ifit1</b>    | 2,56 | 10462623 | BC003768                                                     | interferon-induced protein with tetratricopeptide repeats 1  |
| <b>Ifit3</b>    | 2,30 | 10462618 | BC089563                                                     | interferon-induced protein with tetratricopeptide repeats 3  |
| <b>Ikzf1</b>    | 0,40 | 10374333 | BC138789 L03547 AY536269 AK220235 AK077815 AK154175 AK040268 | IKAROS family zinc finger 1                                  |
| <b>Inpp5d</b>   | 0,41 | 10348244 | BC108328                                                     | inositol polyphosphate-5-phosphatase D                       |
| <b>Irg1</b>     | 2,34 | 10416837 | L38281                                                       | immunoresponsive gene 1                                      |
| <b>Itga2</b>    | 2,26 | 10412267 | BC065139                                                     | integrin alpha 2                                             |
| <b>Itga4</b>    | 0,43 | 10473125 | AF109136                                                     | integrin alpha 4                                             |
| <b>Itga9</b>    | 0,45 | 10590031 | BC150824                                                     | integrin alpha 9                                             |
| <b>Itgal</b>    | 0,36 | 10557591 | BC145096                                                     | integrin alpha L                                             |
| <b>Itgam</b>    | 0,33 | 10557862 |                                                              | integrin alpha M                                             |
| <b>Itgb7</b>    | 2,42 | 10432957 | M68903                                                       | integrin beta 7                                              |
| <b>Lass4</b>    | 0,39 | 10569972 | BC003946                                                     | LAG1 homolog, ceramide synthase 4                            |
| <b>Lfng</b>     | 0,31 | 10527012 | BC115680                                                     | LFNG O-fucosylpeptide 3-beta-N-acetylglucosaminyltransferase |
| <b>Lifr</b>     | 0,36 | 10422822 | D26177                                                       | leukemia inhibitory factor receptor                          |
| <b>Lix1</b>     | 0,28 | 10442069 | BC052700                                                     | limb expression 1 homolog (chicken)                          |
| <b>Lmo2</b>     | 0,38 | 10474201 | BC057880                                                     | LIM domain only 2                                            |
| <b>Lpar5</b>    | 0,37 | 10541799 | BC117528                                                     | lysophosphatidic acid receptor 5                             |
| <b>Lpcat2</b>   | 0,31 | 10573939 | AB244716                                                     | lysophosphatidylcholine acyltransferase 2                    |
| <b>Lrmp</b>     | 0,40 | 10542691 | BC052909                                                     | lymphoid-restricted membrane protein                         |
| <b>Lrrc33</b>   | 0,27 | 10439058 | BC027411                                                     | leucine rich repeat containing 33                            |
| <b>Lsp1</b>     | 0,44 | 10559207 | D49691                                                       | lymphocyte specific 1                                        |
| <b>Ltb</b>      | 0,40 | 10444752 | U16985                                                       | lymphotoxin B                                                |
| <b>Lyl1</b>     | 0,38 | 10573419 | BC005736                                                     | lymphoblastic leukemia 1                                     |
| <b>Map4k1</b>   | 0,40 | 10551666 | BC005433                                                     | mitogen-activated protein kinase kinase kinase 1             |
| <b>Mfng</b>     | 0,39 | 10430389 | BC010983                                                     | MFNG O-fucosylpeptide 3-beta-N-acetylglucosaminyltransferase |
| <b>Mgp</b>      | 0,37 | 10548879 | BC036991                                                     | matrix Gla protein                                           |

|                 |      |          |                          |                                                                                             |
|-----------------|------|----------|--------------------------|---------------------------------------------------------------------------------------------|
| <b>Mical1</b>   | 0,34 | 10362767 | BC034682                 | microtubule associated monooxygenase, calponin and LIM domain containing 1                  |
| <b>Mmp10</b>    | 2,62 | 10583090 | Y13185                   | matrix metalloproteinase 10                                                                 |
| <b>Mmp12</b>    | 3,50 | 10583056 | BC019135                 | matrix metalloproteinase 12                                                                 |
| <b>Mmp13</b>    | 2,87 | 10583044 | BC125320                 | matrix metalloproteinase 13                                                                 |
| <b>Mmp14</b>    | 2,55 | 10415052 | BC076638                 | matrix metalloproteinase 14 (membrane-inserted)                                             |
| <b>Mocs1</b>    | 0,45 | 10445826 | BC027444                 | molybdenum cofactor synthesis 1                                                             |
| <b>Ms4a6b</b>   | 0,46 | 10461622 | AF237909                 | membrane-spanning 4-domains, subfamily A, member 6B                                         |
| <b>Msn</b>      | 0,45 | 10600836 | BC047366                 | moesin                                                                                      |
| <b>Mycl1</b>    | 2,61 | 10507798 | BC053059                 | v-myc myelocytomatosis viral oncogene homolog 1, lung carcinoma derived (avian)             |
| <b>Myo1g</b>    | 0,40 | 10384154 | BC113755                 | myosin IG                                                                                   |
| <b>Nagpa</b>    | 0,46 | 10437541 | BC039790                 | N-acetylglucosamine-1-phosphodiester alpha-N-acetylglucosaminidase                          |
| <b>Napsa</b>    | 0,44 | 10552697 | D88899                   | napsin A aspartic peptidase                                                                 |
| <b>Nbeal2</b>   | 0,45 | 10597182 | BC157956                 | neurobeachin-like 2                                                                         |
| <b>Ncf2</b>     | 0,40 | 10412123 | BC076609                 | neutrophil cytosolic factor 2                                                               |
| <b>Ncf4</b>     | 0,41 | 10425053 | AB002665                 | neutrophil cytosolic factor 4                                                               |
| <b>Ndst4</b>    | 2,16 | 10495878 | AB036838                 | N-deacetylase/N-sulfotransferase (heparin glucosaminyl) 4                                   |
| <b>Nefm</b>     | 0,46 | 10421100 | DQ201636                 | neurofilament, medium polypeptide                                                           |
| <b>Nfam1</b>    | 0,27 | 10430931 | BC150488                 | Nfat activating molecule with ITAM motif 1                                                  |
| <b>Nfatc2</b>   | 0,39 | 10489961 | EU887584                 | nuclear factor of activated T-cells, cytoplasmic, calcineurin-dependent 2                   |
| <b>Nfe2l3</b>   | 2,32 | 10538275 | AB013852                 | nuclear factor, erythroid derived 2, like 3                                                 |
| <b>Nipsnap1</b> | 0,45 | 10373950 | BC010837                 | 4-nitrophenylphosphatase domain and non-neuronal SNAP25-like protein homolog 1 (C. elegans) |
| <b>Nlrp3</b>    | 0,45 | 10376513 | AY495376                 | NLR family, pyrin domain containing 3                                                       |
| <b>Nov</b>      | 2,55 | 10424119 | BC003774                 | nephroblastoma overexpressed gene                                                           |
| <b>Nr0b2</b>    | 0,27 | 10508887 | BC019540                 | nuclear receptor subfamily 0, group B, member 2                                             |
| <b>Nuak2</b>    | 0,38 | 10349782 | BC033302                 | NUAK family, SNF1-like kinase, 2                                                            |
| <b>Ogfrl1</b>   | 0,39 | 10353524 | BC019747                 | opioid growth factor receptor-like 1                                                        |
| <b>Pag1</b>     | 0,48 | 10497237 | BC145761                 | phosphoprotein associated with glycosphingolipid microdomains 1                             |
| <b>Parvg</b>    | 0,34 | 10425866 | BC011200 AF312712        | parvin, gamma                                                                               |
| <b>Penk</b>     | 2,85 | 10511363 | M55181                   | preproenkephalin                                                                            |
| <b>Pik3cd</b>   | 0,40 | 10518686 | BC035203 U86587 CT010349 | phosphatidylinositol 3-kinase catalytic delta polypeptide                                   |
| <b>Pik3cg</b>   | 0,43 | 10399924 | AJ249280                 | phosphoinositide-3-kinase, catalytic, gamma polypeptide                                     |

|                             |      |          |                            |                                                                                                                                   |
|-----------------------------|------|----------|----------------------------|-----------------------------------------------------------------------------------------------------------------------------------|
| <b>Pilra</b>                | 0,30 | 10534927 | BC115565                   | paired immunoglobulin-like type 2 receptor alpha                                                                                  |
| <b>Pilrb1</b>               | 0,40 | 10534935 | BC145880                   | paired immunoglobulin-like type 2 receptor beta 1                                                                                 |
| <b>Pilrb2 Pilrb1</b>        | 0,32 | 10534940 | BC147406 BC145880          | paired immunoglobulin-like type 2 receptor beta 2   paired immunoglobulin-like type 2 receptor beta 1                             |
| <b>Pin4</b>                 | 2,28 | 10552284 | BC119355                   | protein (peptidyl-prolyl cis/trans isomerase) NIMA-interacting, 4 (parvulin)                                                      |
| <b>Pin4</b>                 | 2,28 | 10601272 | BC119355                   | protein (peptidyl-prolyl cis/trans isomerase) NIMA-interacting, 4 (parvulin)                                                      |
| <b>Pkd1l1</b>               | 2,16 | 10384266 | AB061684                   | polycystic kidney disease 1 like 1                                                                                                |
| <b>Pld5</b>                 | 2,59 | 10360463 | BC100428                   | phospholipase D family, member 5                                                                                                  |
| <b>Ppp1r12c</b>             | 0,41 | 10559524 | BC114396                   | protein phosphatase 1, regulatory (inhibitor) subunit 12C                                                                         |
| <b>Ppp1r13b</b>             | 0,45 | 10402730 | BC053092                   | protein phosphatase 1, regulatory (inhibitor) subunit 13B                                                                         |
| <b>Prdm1</b>                | 3,06 | 10368970 | U08185                     | PR domain containing 1, with ZNF domain                                                                                           |
| <b>Prkch</b>                | 0,42 | 10396402 | BC031121                   | protein kinase C, eta                                                                                                             |
| <b>Prl2c3 Prl2c4 Prl2c2</b> | 4,57 | 10407797 | BC100299 K03235 BC100300   | prolactin family 2, subfamily c, member 3   prolactin family 2, subfamily c, member 4   prolactin family 2, subfamily c, member 2 |
| <b>Prl2c5 Prl2c2</b>        | 2,96 | 10403579 | AF128884                   | prolactin family 2, subfamily c, member 5   prolactin family 2, subfamily c, member 2                                             |
| <b>Prss16</b>               | 0,20 | 10408097 | BC125481                   | protease, serine, 16 (thymus)                                                                                                     |
| <b>Prune2</b>               | 0,41 | 10461878 | BC094224                   | prune homolog 2 (Drosophila)                                                                                                      |
| <b>Ptgir</b>                | 0,30 | 10550394 | D26157                     | prostaglandin I receptor (IP)                                                                                                     |
| <b>Ptpn18</b>               | 0,44 | 10345370 | U35124                     | protein tyrosine phosphatase, non-receptor type 18                                                                                |
| <b>Ptpn6</b>                | 0,44 | 10547769 | BC012660                   | protein tyrosine phosphatase, non-receptor type 6                                                                                 |
| <b>Pycard</b>               | 0,42 | 10568355 | AB032249                   | PYD and CARD domain containing                                                                                                    |
| <b>Qpct</b>                 | 3,11 | 10447056 | BC151027                   | glutaminyl-peptide cyclotransferase (glutaminyl cyclase)                                                                          |
| <b>Qprt</b>                 | 0,35 | 10568169 | BC011191                   | quinolinate phosphoribosyltransferase                                                                                             |
| <b>Rab19</b>                | 0,38 | 10537428 | BC032936                   | RAB19, member RAS oncogene family                                                                                                 |
| <b>Rab27a</b>               | 0,33 | 10587023 | AF304376                   | RAB27A, member RAS oncogene family                                                                                                |
| <b>Rab3il1</b>              | 0,39 | 10461408 | BC020147                   | RAB3A interacting protein (rabin3)-like 1                                                                                         |
| <b>Raet1d Raet1e Raet1b</b> | 0,33 | 10362091 | AF257520 AY056835 BC132022 | retinoic acid early transcript delta   retinoic acid early transcript 1E   retinoic acid early transcript beta                    |
| <b>Rasa4</b>                | 0,36 | 10526459 | BC049381                   | RAS p21 protein activator 4                                                                                                       |
| <b>Rasa13 A530088E08Rik</b> | 0,38 | 10449893 | BC132341                   | RAS protein activator like 3   RIKEN cDNA A530088E08 gene                                                                         |
| <b>Rasgef1a</b>             | 2,31 | 10541114 | BC138284                   | RasGEF domain family, member 1A                                                                                                   |
| <b>Rasgrp3</b>              | 0,41 | 10446965 | BC066127                   | RAS, guanyl releasing protein 3                                                                                                   |
| <b>Rassf4</b>               | 0,35 | 10547177 | BC060709                   | Ras association (RalGDS/AF-6) domain family member 4                                                                              |
| <b>Rassf5</b>               | 0,36 | 10357594 | BC089605                   | Ras association (RalGDS/AF-6) domain family member 5                                                                              |



|                              |      |          |                                                                                           |                                                                                                                                                    |
|------------------------------|------|----------|-------------------------------------------------------------------------------------------|----------------------------------------------------------------------------------------------------------------------------------------------------|
| <b>Rcsd1</b>                 | 0,31 | 10359762 | BC025872                                                                                  | RCS domain containing 1                                                                                                                            |
| <b>Rgs14</b>                 | 0,39 | 10405432 | BC030321                                                                                  | regulator of G-protein signaling 14                                                                                                                |
| <b>Rgs3</b>                  | 0,41 | 10607113 | BC033449                                                                                  | regulator of G-protein signaling 3                                                                                                                 |
| <b>Rhof Tmem120b</b>         | 0,40 | 10533603 | BC132355                                                                                  | ras homolog gene family, member f   transmembrane protein 120B                                                                                     |
| <b>Rinl</b>                  | 0,42 | 10551587 | BC046530                                                                                  | Ras and Rab interactor-like                                                                                                                        |
| <b>Rnase4 Ang</b>            | 0,36 | 10414537 | AY762362 BC055355                                                                         | ribonuclease, RNase A family 4   angiogenin, ribonuclease, RNase A family, 5                                                                       |
| <b>Rock2</b>                 | 0,38 | 10394731 | BC056964                                                                                  | Rho-associated coiled-coil containing protein kinase 2                                                                                             |
| <b>Rsad2</b>                 | 2,89 | 10399710 | BC057868                                                                                  | radical S-adenosyl methionine domain containing 2                                                                                                  |
| <b>Samsn1</b>                | 0,39 | 10440393 | BC052906                                                                                  | SAM domain, SH3 domain and nuclear localization signals, 1                                                                                         |
| <b>Selp1g</b>                | 0,40 | 10532744 | BC003874                                                                                  | selectin, platelet (p-selectin) ligand                                                                                                             |
| <b>Serpinb10-ps Serpinb2</b> | 0,13 | 10349166 | BC029736                                                                                  | serine (or cysteine) peptidase inhibitor, clade B (ovalbumin), member 10, pseudogene   serine (or cysteine) peptidase inhibitor, clade B, member 2 |
| <b>Sgk3</b>                  | 0,33 | 10344750 | AF312007                                                                                  | serum/glucocorticoid regulated kinase 3                                                                                                            |
| <b>Sh3d20 Arhgap27</b>       | 0,40 | 10391914 | BC138292                                                                                  | SH3 domain containing 20   Rho GTPase activating protein 27                                                                                        |
| <b>Siglece</b>               | 0,42 | 10562720 | BC023280                                                                                  | sialic acid binding Ig-like lectin E                                                                                                               |
| <b>Slamf9</b>                | 0,45 | 10351792 | BC019477                                                                                  | SLAM family member 9                                                                                                                               |
| <b>Slc16a6</b>               | 0,38 | 10392440 | BC017129                                                                                  | solute carrier family 16 (monocarboxylic acid transporters), member 6                                                                              |
| <b>Slc25a38</b>              | 0,37 | 10590245 | BC010801                                                                                  | solute carrier family 25, member 38                                                                                                                |
| <b>Slc7a11</b>               | 2,73 | 10498024 | AY766236                                                                                  | solute carrier family 7 (cationic amino acid transporter, y+ system), member 11                                                                    |
| <b>Slc9a9</b>                | 0,35 | 10587854 | BC099942                                                                                  | solute carrier family 9 (sodium/hydrogen exchanger), member 9                                                                                      |
| <b>Slco2b1</b>               | 0,26 | 10565819 | BC019209                                                                                  | solute carrier organic anion transporter family, member 2b1                                                                                        |
| <b>Smox</b>                  | 0,39 | 10476301 | BC004831                                                                                  | spermine oxidase                                                                                                                                   |
| <b>Snora20</b>               | 0,41 | 10441813 |                                                                                           | small nucleolar RNA, H/ACA box 20                                                                                                                  |
| <b>Snx20</b>                 | 0,45 | 10580504 | BC039809                                                                                  | sorting nexin 20                                                                                                                                   |
| <b>Spn</b>                   | 0,44 | 10568174 | BC100741                                                                                  | sialoporphin                                                                                                                                       |
| <b>Spsb3</b>                 | 0,45 | 10442629 | BC072556 AF403038 AK167474 AK156579 BC026523 AK212011 AK199452 AK208775 AK199344 AK186791 | splA/ryanodine receptor domain and SOCS box containing 3                                                                                           |
| <b>Ssh2</b>                  | 0,34 | 10378855 |                                                                                           | slingshot homolog 2 (Drosophila)                                                                                                                   |
| <b>Stard8</b>                | 0,44 | 10600921 | BC062944                                                                                  | START domain containing 8                                                                                                                          |
| <b>Saa3</b>                  | 5,55 | 10563597 | BC055885                                                                                  | serum amyloid A 3                                                                                                                                  |
| <b>Tagap</b>                 | 0,33 | 10441601 | BC030886                                                                                  | T-cell activation Rho GTPase-activating protein                                                                                                    |
| <b>Tcf19</b>                 | 0,44 | 10450519 | BC004617                                                                                  | transcription factor 19                                                                                                                            |
| <b>Thsd4</b>                 | 2,91 | 10594199 | BC139329 AK148408                                                                         | thrombospondin, type I, domain containing 4                                                                                                        |

|                       |      |          |                                              |                                                                                          |
|-----------------------|------|----------|----------------------------------------------|------------------------------------------------------------------------------------------|
| <b>Tifab</b>          | 0,37 | 10409567 | BC031130                                     | TRAF-interacting protein with forkhead-associated domain, family member B                |
| <b>Tm6sf1 Hdgfrp3</b> | 0,34 | 10554574 | BC023123                                     | transmembrane 6 superfamily member 1   hepatoma-derived growth factor, related protein 3 |
| <b>Tmc8</b>           | 0,43 | 10382956 | AY263160 BC138254 BC145210 AY236501 AK220211 | transmembrane channel-like gene family 8                                                 |
| <b>Tnfaip8l2</b>      | 0,42 | 10500100 | BC094616                                     | tumor necrosis factor, alpha-induced protein 8-like 2                                    |
| <b>Tnfrsf9</b>        | 2,26 | 10510580 | DQ832278 DQ832279 BC028507 J04492            | tumor necrosis factor receptor superfamily, member 9                                     |
| <b>Tnfsf14</b>        | 0,41 | 10452307 | AB029155                                     | tumor necrosis factor (ligand) superfamily, member 14                                    |
| <b>Topors</b>         | 2,37 | 10512088 | AB072395                                     | topoisomerase I binding, arginine/serine-rich                                            |
| <b>Trem1</b>          | 0,26 | 10445746 | BC111875                                     | triggering receptor expressed on myeloid cells 1                                         |
| <b>Trem3</b>          | 0,43 | 10445753 | AF241220                                     | triggering receptor expressed on myeloid cells 3                                         |
| <b>Trf</b>            | 0,33 | 10596148 | BC092046                                     | transferrin                                                                              |
| <b>Trim65</b>         | 0,43 | 10393113 | BC057094                                     | tripartite motif-containing 65                                                           |
| <b>Unc119</b>         | 0,32 | 10379176 | BC001990                                     | unc-119 homolog (C. elegans)                                                             |
| <b>Was</b>            | 0,43 | 10603440 | U29673                                       | Wiskott-Aldrich syndrome homolog (human)                                                 |
| <b>Wdfy4</b>          | 0,39 | 10418868 |                                              | WD repeat and FYVE domain containing 4                                                   |

### 3 Information on the investigated cytokines

**Table S5:** Overview over the by multiplex assay investigated cytokines and their function

| Name         | Synonym       | Function                                                                                                                                                                                              | Multiplex assay |      |
|--------------|---------------|-------------------------------------------------------------------------------------------------------------------------------------------------------------------------------------------------------|-----------------|------|
|              |               |                                                                                                                                                                                                       | Human           | Mice |
| <b>CCL2</b>  | MCP-1         | Recruits dendritic cells, monocytes and T cells to the sites of inflammation [1, 2]                                                                                                                   | x               | x    |
| <b>CCL3</b>  | MIP- $\alpha$ | Recruits and activates leukocytes, part of the acute inflammatory state, crucial for immune response to inflammation, induce release of other pro-inflammatory cytokines [3, 4]                       | x               | x    |
| <b>CCL4</b>  | MIP- $\beta$  | Activates granulocytes, can lead to acute neutrophilic inflammation, induce release of other pro-inflammatory cytokines, chemoattractant for a variety of immune cells [5]                            | x               | x    |
| <b>CCL5</b>  | RANTES        | Recruits monocytes and T cells to the sites of inflammation [6]                                                                                                                                       |                 | x    |
| <b>CCL7</b>  | MCP-3         | One of the most broadly active chemoattractants, attracts monocytes, eosinophils, basophils, NK cells, T lymphocytes, and neutrophils, promotes monocyte mobilization to inflammatory sites [7, 8, 9] |                 | x    |
| <b>CXCL8</b> | IL-8          | Attracts leukocytes to sites of acute inflammation, activates monocytes [6]                                                                                                                           | x               |      |
| <b>CXCL9</b> | MIG           | Is induced by IFN- $\gamma$ and functions as a T-cell chemoattractant [10]                                                                                                                            | x               |      |
| <b>CSF2</b>  | GM-CSF        | Promotes the differentiation, growth and effector functions of neutrophils and macrophages [11, 12]                                                                                                   |                 | x    |
| <b>CSF3</b>  | G-CSF         | Promotes the expansion and maturation of neutrophils, mobilizes hemopoietic stem cells to peripheral blood, has immunoregulatory effects [13, 14, 15]                                                 | x               |      |

Abbreviations: CCL - chemokine (C-C motif) ligand; CSF - colony stimulating factor; CXCL - CXC-Motive-Chemokine; G-CSF - granulocyte colony-stimulating factor; GM-CSF - Granulocyte-macrophage colony-stimulating factor; IL-8 - interleukin 8; MCP - monocyte chemotactic protein; MIG - Monokine induced by gamma interferon; MIP - macrophage inflammatory protein; RANTES - Regulated on Activation, Normal T cell Expressed and Secreted

#### 4 Investigation of the effect of SWCNT exposure on the cell morphology of A549, THP-1 and J774 cells.

To show the influence of the SWCNT exposure to the cell morphology, A549, THP-1 (in differentiation medium) and J774 cells were seeded two days before the experiment, aiming for 70 - 80% confluence at the start of exposure. The cells were exposed to 3 mL 10  $\mu\text{g/mL}$  SWCNT in  $\text{CO}_2$  independent DMEM (GIBCO) supplemented with 10% FBS during the time lapse experiment. Live-cell imaging was started directly after the initial exposure, using a Leica DMIL LED microscope equipped with a 37°C heated stage with mounted Leica DFC 295 camera and Leica Application Suite Multitime-Movie-Timelapse software (both from Leica Microsystems, Switzerland), taking one picture every 30 seconds for a total duration of 2 hours at 200x magnification. After 2 hours, the  $\text{CO}_2$  independent medium was replaced with normal growth medium with or without 10  $\mu\text{g/mL}$  SWCNTs and incubated at 37°C, 5%  $\text{CO}_2$  for 22 hours. After 24 hours of total exposure the medium was replaced with 3 mL  $\text{CO}_2$  independent DMEM (GIBCO) supplemented with 10%FBS with and without 10  $\mu\text{g/mL}$  SWCNT followed by 2 hours live-cell imaging as described before. ImageJ software [16] was used for editing the time lapse images and data are presented as still images (Fig. S6).

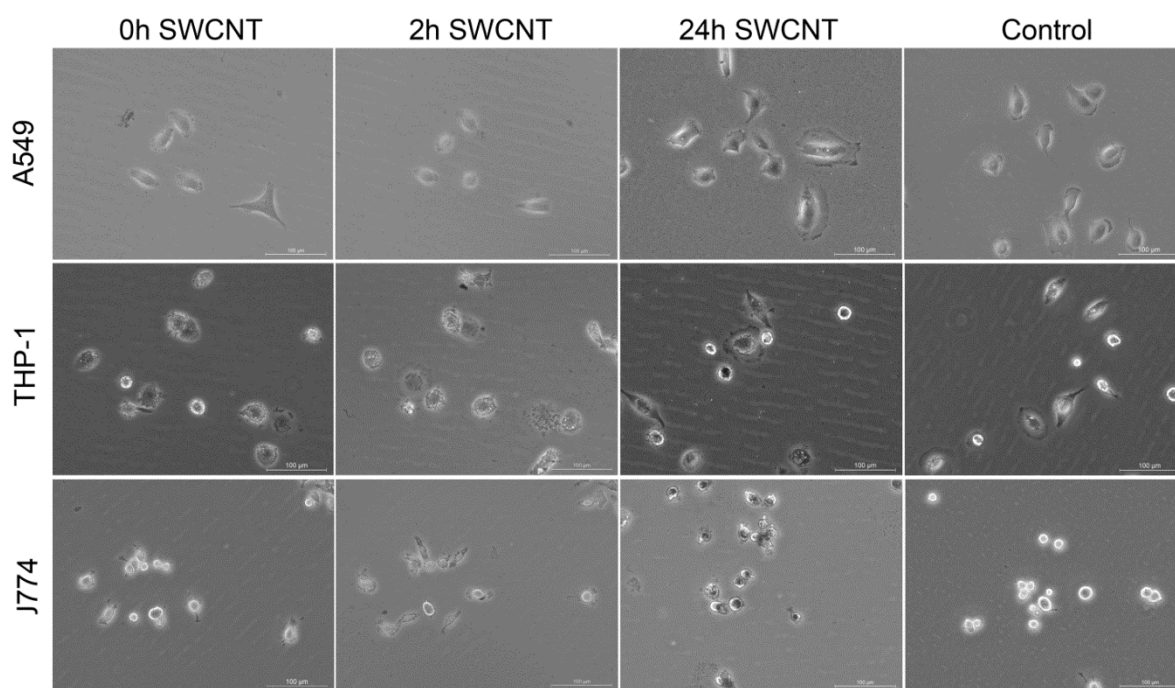

**Figure S6:** Investigation of the effect of SWCNT exposure to the cell morphology of A549, THP-1 and J774 cells. The cells were untreated (control) or exposed to 10 $\mu\text{g/mL}$  SWCNTs for 0, 2 and 24 hours. Original magnification 200x.

## 5 References Supplementary Data

- [1] L. L. Xu, M. K. Warren, W. L. Rose, W. Gong and J. M. Wang, Human recombinant monocyte chemotactic protein and other C-C chemokines bind and induce directional migration of dendritic cells in vitro, *J. Leukoc. Biol.*, 1996, **60**, 365–371.
- [2] M.W.Carr, S. J. Roth, E. Luther, S. S. Rose and T. A. Springer, Monocyte chemoattractant protein 1 acts as a T-lymphocyte chemoattractant, *Proc. Natl. Acad. Sci. U. S. A.*, 1994, **91**, 3652–3656.
- [3] M. Maurer, E. von Stebut, Macrophage inflammatory protein-1, *Int. J. Biochem. Cell Biol.*, 2004, 36, 1882–1886.
- [4] M. Ren, Q. Guo, L. Guo, M. Lenz, F. Qian, R. R. Koenen, H. Xu, A. B. Schilling, C. Weber, R. D. Ye, A. R. Dinner and W. J. Tang, Polymerization of MIP-1 chemokine (CCL3 and CCL4) and clearance of MIP-1 by insulin-degrading enzyme, *EMBO J.*, 2010, **29**, 3952–3966.
- [5] R. S. Bystry, V. Aluvihare, K. A. Welch, M. Kallikourdis and A. G. Betz, B cells and professional APCs recruit regulatory T cells via CCL4, *Nat. Immunol.*, 2001, **2**, 1126–1132.
- [6] I. F. Charo and R. M. Ransohoff, The many roles of chemokines and chemokine receptors in inflammation, *N. Engl. J. Med.*, 2006, **354**, 610-621.
- [7] T. Jia, N. V. Serbina, K. Brandl, M. X. Zhong, I. M. Leiner, I. F. Charo, E. G. Pamer, Additive roles for MCP-1 and MCP-3 in CCR2-mediated recruitment of inflammatory monocytes during *Listeria monocytogenes* infection, *J. Immunol.*, 2008, **180**, 6846-6853.
- [8] Y. Si, C. L. Tsou, K. Croft and I. F. Charo, CCR2 mediates hematopoietic stem and progenitor cell trafficking to sites of inflammation in mice, *J. Clin. Invest.*, 2010, **120**, 1192-1203.

- [9] C. L. Tsou, W. Peters, Y. Si, S. Slaymaker, A. M. Aslanian, S. P. Weisberg, M. Mack and I. F. Charo, Critical roles for CCR2 and MCP-3 in monocyte mobilization from bone marrow and recruitment to inflammatory sites, *J. Clin. Invest.*, 2007, **117**, 902-909.
- [10] J. R. Groom and A. D. Luster, CXCR3 ligands, redundant, collaborative and antagonistic functions, *Immunol. Cell Biol.*, 2011, **89**, 207-215.
- [11] J. L. Eyles, A. W. Roberts, D. Metcalf and I. P. Wicks, Granulocyte colony-stimulating factor and neutrophils-forgotten mediators of inflammatory disease, *Nat. Clin. Pract. Rheumatol.*, 2006, **2**, 500–510.
- [12] N. A. Nicola, (Ed.) Guidebook to cytokines and their receptors, Oxford University Press, Oxford, UK, 1994.
- [13] E. Shochat, V. Rom-Kedar and L. A. Segel, G-CSF control of neutrophils dynamics in the blood, *Bull Math Biol*, 2007, **69**, 2299–2338.
- [14] B. Nervi, D. C. Link and J. F. DiPersio, Cytokines and hematopoietic stem cell mobilization, *J. Cell. Biochem.*, 2006, **99**, 690–705.
- [15] B. G. Xiao, C. Z. Lu and H. Link, Cell biology and clinical promise of G-CSF, immunomodulation and neuroprotection, *J. Cell Mol. Med.*, 2007, **11**, 1272–1290.
- [16] C. A. Schneider, W. S. Rasband and K. W. Eliceiri, NIH Image to ImageJ: 25 years of image analysis, *Nat. Methods*, 2012, **9**, 671-675.
